# Supplementary material for: A New Fluorescence Probe Based on Self-absorption for Detection of Co2+ and Viscosity
Source: Research Square preprint supplement (doi:10.21203/rs.3.rs-7194736/v1), 2025-08-19
Supplement: Supplementary file 1 [file 16bc7c3261b271bc86bc4a78.docx]

1. **Supporting Information**

**A New Fluorescence Probe Based on Self-absorption for Detection of Co2+ and Viscosity**

Huizhen WANGa*, Dingxin QIUa, Pengbo WANGb, Pei WUb, Kezhen GOUc, Yan TANGa, Guanjun CHANGd*

1. Experimental method:

1HNMR titration : Accurately weigh 3 portions of 20mg probe HDN and dissolve with 1.0mL DMSO-d6. Co2+ are 0.5, 1.0, and 1.5 equiv. of probe HDN, respectively.

Chitosan cross-linking reaction: 0.3 g of chitosan was dissolved in 90 mL 1.0% acetic acid solution. Then, 900 uL **HDN** (1.0 × 10-3 mol/L) was added and thoroughly stirred. Next, add 5.0 milliliters of this solution to each of the 9 beakers. Then, add 0.5, 1.0, 1.5, 2.0, 2.5, 3.0, 3.5, 4.0, and 4.5 mL of 10% glutaraldehyde aqueous solution to each beaker, stir until the crosslinking reaction is complete, and perform fluorescence testing separately.

2. The 1H NMR、13C NMR、IR、HR-MS of compound HDN


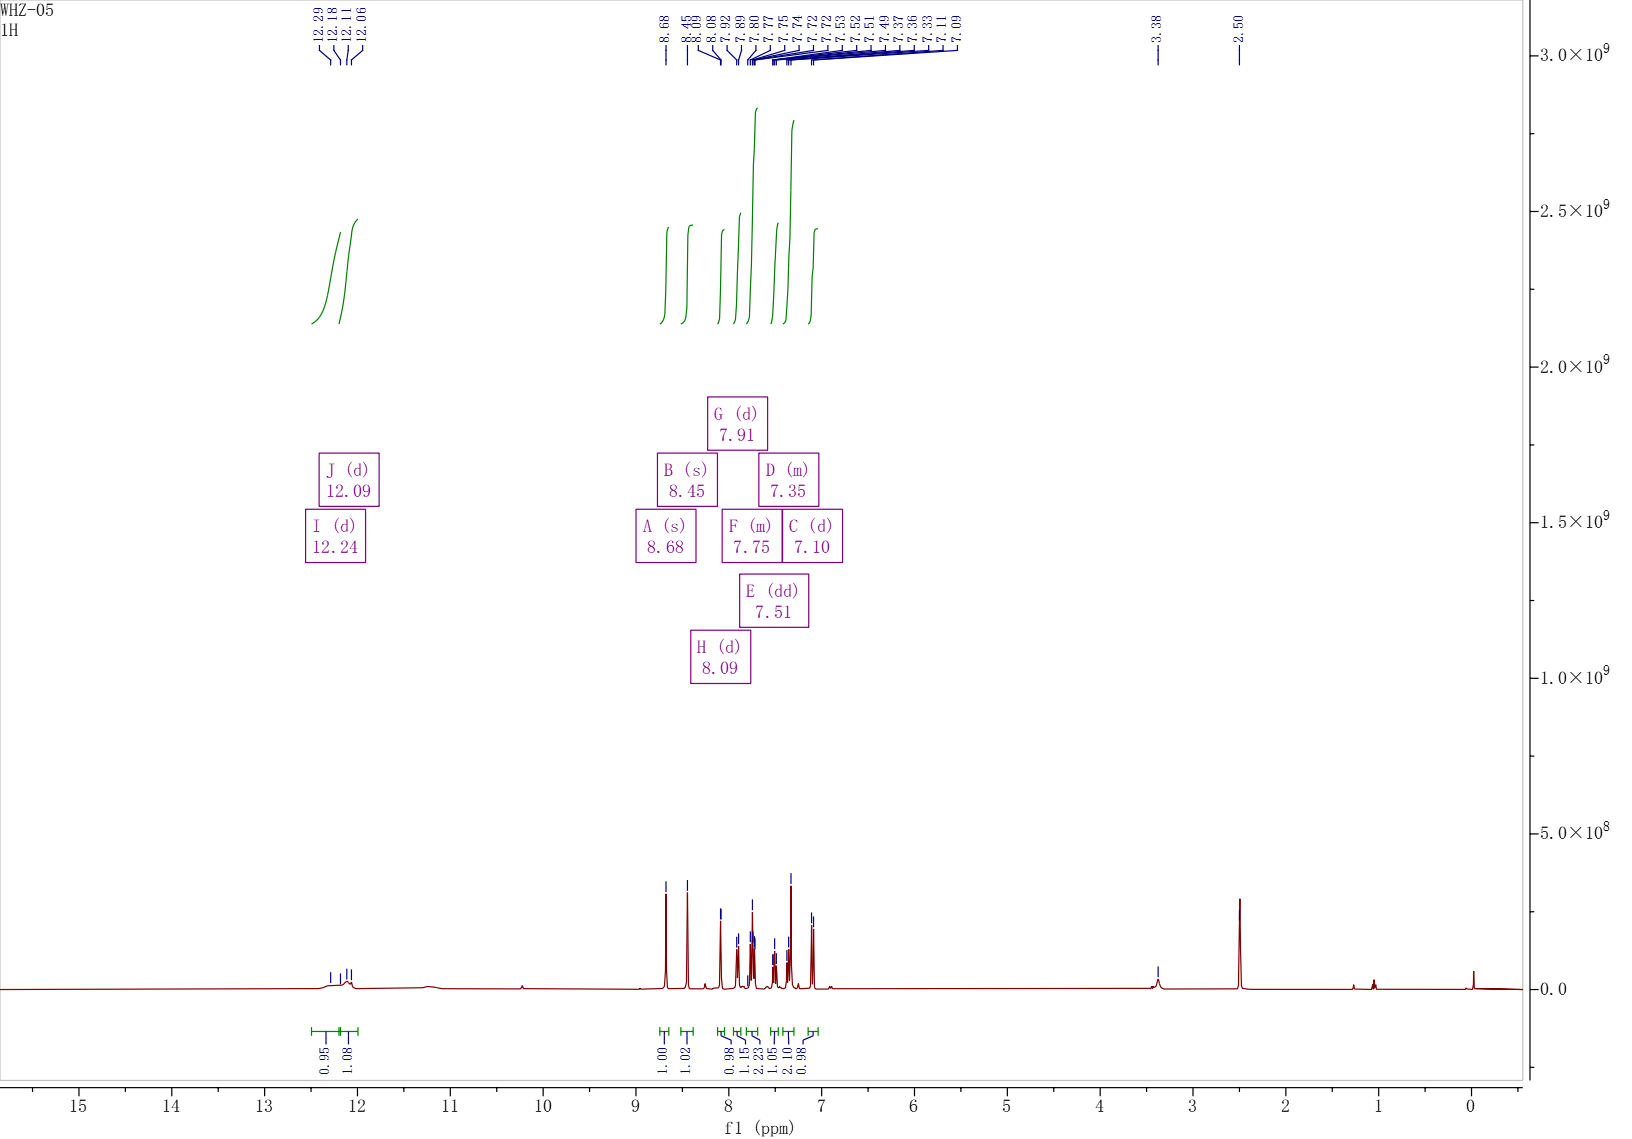


**Fig. S1.** 1H NMR spectrum of probe **HDN**.


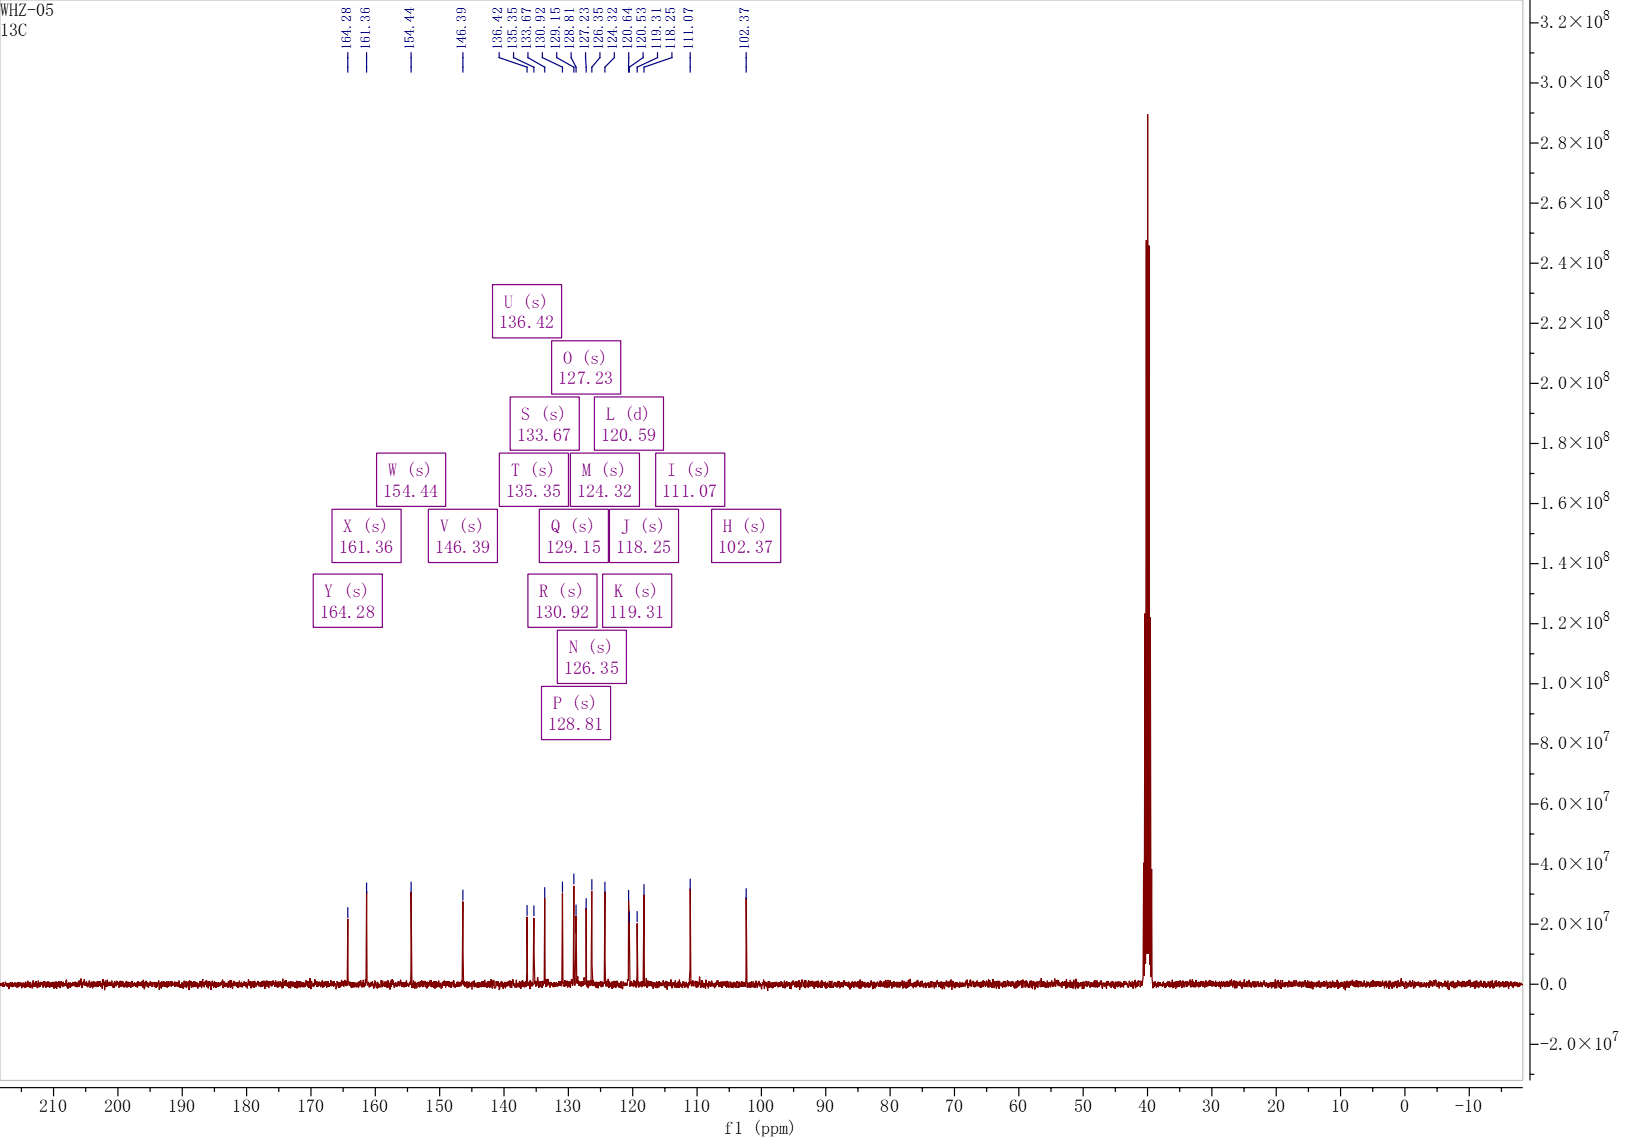


**Fig. S2.** 13C NMR spectrum of probe **HDN**.

**Fig. S3.** Infrared spectrum of probe **HDN**.

**Fig. S4.** Infrared spectrum of probe **HDN+Co2+**.


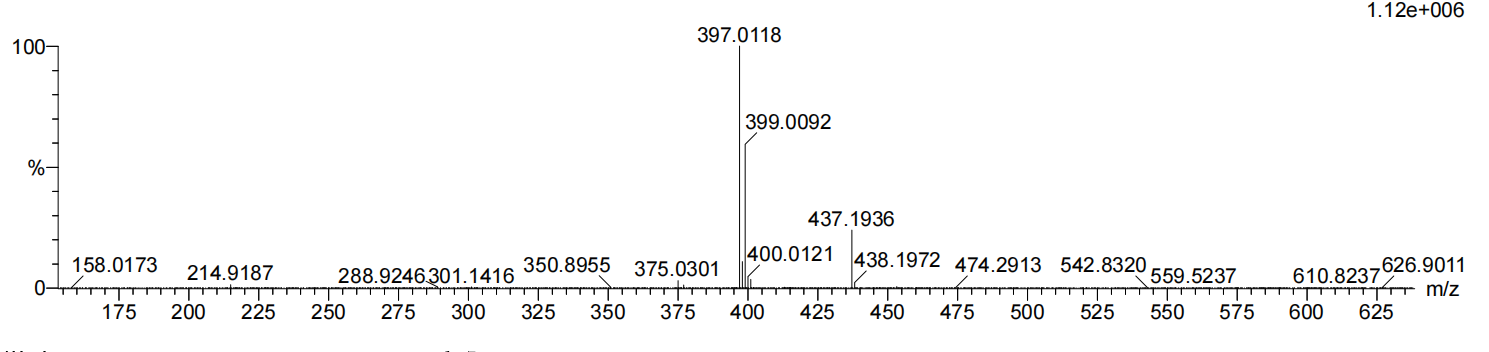


**Fig. S5.** The mass spectrum of probe **HDN**

2 Spectroscopic research


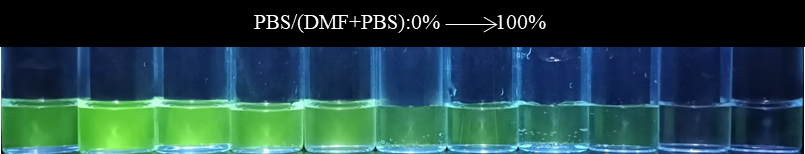


**Fig. S6.** Fluorescence (a) and Uv-vis (b) spectra of probe **HDN** in different PBS/DMF systems (PBS/DMF=4:6; λex=360 nm).

**Fig. S7.** The Uv-vis response of probe **HDN** by adding Co2+ and other anions. (λex = 360 nm, PBS/DMF=4:6)

**Fig.S8.** Job’s plot of probe **HDN**-Co2+ (λex = 360 nm, PBS/DMF=4:6)
